# Supplementary material
Source: PubMed Central journal article supplement (PMC8054721)
Supplement: sj-pdf-1-jcb-10.1177_0271678X20941449.pdf [file sj-pdf-1-jcb-10.1177_0271678X20941449.pdf]

## **SUPPLEMENTARY INFORMATION**

### **Efficient isolation of brain capillary from a single frozen mouse brain for protein expression analysis**

Seiryu Ogata<sup>1</sup>, Shingo Ito<sup>1,2</sup>, Takeshi Masuda<sup>1,2</sup>, Sumio Ohtsuki<sup>1,2\*</sup>

<sup>1</sup>Department of Pharmaceutical Microbiology, Graduate School of Pharmaceutical Sciences, Kumamoto University, 5-1 Oe-honmachi, Chuo-ku, Kumamoto 862-0973, Japan

<sup>2</sup>Department of Pharmaceutical Microbiology, Faculty of Life Sciences, Kumamoto University, 5-1 Oe-honmachi, Chuo-ku, Kumamoto 862-0973, Japan

\*Corresponding author: Sumio Ohtsuki, Ph.D.

Department of Pharmaceutical Microbiology, Faculty of Life Sciences, Kumamoto University, 5-1 Oe-honmachi, Chuo-ku, Kumamoto 862-0973, Japan

TEL: +81-96-371-4323; FAX: +81-96-371-4329; E-mail: sohtsuki@kumamoto-u.ac.jp

**Supplemental Tables: S1-S9**

**Supplemental Figure: S1-S6**

Table S1. Numbers of brain or brain amount needed for brain capillary isolation of each species using for proteomic analysis.

| Author                    | Species       | Numbers of brain or brain amount for isolation | Method                               | Reference |
|---------------------------|---------------|------------------------------------------------|--------------------------------------|-----------|
| Gomez-Zepeda et al., 2019 | mouse         | 5 brains                                       | Dextran, mesh filtration             | (12)      |
| Chun et al., 2011         | mouse         | 6 brains                                       | Ficoll, mesh filtration, glass beads | (7)       |
| Agarwal et al., 2012      | mouse         | 10 brains                                      | Ficoll, glass beads                  | (13)      |
| Uchida et al., 2013       | mouse         | 10 brains                                      | Dextran, mesh filtration             | (9)       |
| Al Feteisi et al., 2018   | rat           | 3 g brain                                      | Dextran, mesh filtration             | (14)      |
| Hoshi et al., 2013        | rat, marmoset | 3 g brain                                      | Dextran, mesh filtration             | (15)      |
| Kubo et al., 2015         | pig           | -100 g brain                                   | Dextran, mesh filtration             | (16)      |
| Uchida et al., 2011       | human         | 1.0-3.2 g brain                                | Dextran, mesh filtration             | (17)      |
| Al-Majdoub et al., 2019   | human         | 3 g brain                                      | Dextran, mesh filtration             | (18)      |

Table S2. Peptide probes and MRM transitions of mouse molecules

| Protein           | Amino acid sequence | Unlabeled peptide (m/z) |       |       |       |       | Labeled peptide (m/z) |       |       |       |       |
|-------------------|---------------------|-------------------------|-------|-------|-------|-------|-----------------------|-------|-------|-------|-------|
|                   |                     | Q1                      | Q3-1  | Q3-2  | Q3-3  | Q3-4  | Q1                    | Q3-1  | Q3-2  | Q3-3  | Q3-4  |
| Abcb1a<br>(Mdr1a) | ATVSASHIIR          | 352.2                   | 173.1 | 348.7 | 392.2 | 441.8 | 354.5                 | 173.1 | 352.2 | 395.7 | 445.3 |
| Abcc4<br>(Mrp4)   | APVLFDR             | 482.8                   | 268.2 | 584.3 | 697.4 | 796.4 | 486.3                 | 268.2 | 584.3 | 704.4 | 803.5 |
| Abcg2<br>(Bcrp)   | ENLQFSAALR          | 574.8                   | 517.3 | 664.4 | 792.4 | 905.5 | 578.3                 | 524.3 | 671.4 | 799.5 | 912.5 |
| Slc2a1<br>(Glut1) | TFDEIASGFR          | 571.8                   | 466.2 | 537.3 | 650.4 | 894.4 | 573.8                 | 466.2 | 541.3 | 654.4 | 898.4 |
| Slc16a1<br>(Mct1) | SDANTDLIGGSPK       | 637.8                   | 445.2 | 786.4 | 887.4 | 887.5 | 641.3                 | 445.2 | 793.5 | 894.4 | 894.5 |
| Slc22a8<br>(Oat3) | YGLSDLFR            | 485.8                   | 435.3 | 500.3 | 637.3 | 750.4 | 489.3                 | 442.3 | 557.3 | 644.3 | 757.4 |
| Insr              | ESLVISGLR           | 487.3                   | 432.3 | 545.3 | 644.4 | 757.5 | 490.8                 | 439.3 | 552.4 | 651.4 | 764.5 |
| Lrp1              | GDYSVLVPGLR         | 588.3                   | 442.3 | 541.3 | 654.4 | 753.5 | 591.8                 | 449.3 | 548.4 | 661.4 | 760.5 |
| Tfr1              | SSVGTGLLLK          | 487.8                   | 400.8 | 543.4 | 701.5 | 800.5 | 491.3                 | 404.3 | 550.4 | 708.5 | 807.5 |
| Claudin-5         | EFYDPTVPVSQK        | 705.4                   | 428.3 | 558.3 | 855.5 | 970.5 | 708.4                 | 431.3 | 564.3 | 861.5 | 976.5 |

Table S3. Absolute protein expression levels of transporters, receptors and tight junction protein in brain capillary fraction isolated by the standard method and the developed method by MRM.

|                           | Protein name           | Protein amount<br>(fmol/ $\mu$ g protein) |                   | Fold change<br>(D/S) | P-value   |
|---------------------------|------------------------|-------------------------------------------|-------------------|----------------------|-----------|
|                           |                        | Standard                                  | Developed         |                      |           |
| Abc<br>transporter        | Abcb1a<br>(Mdr1a/P-gp) | 9.02 $\pm$ 0.92                           | 18.3 $\pm$ 1.5    | 2.03                 | 8.67.E-05 |
|                           | Abcc4 (Mrp4)           | 0.547 $\pm$ 0.040                         | 0.797 $\pm$ 0.044 | 1.46                 | 2.86.E-02 |
|                           | Abcg2 (Bcrp)           | 2.69 $\pm$ 0.14                           | 3.62 $\pm$ 0.73   | 1.35                 | 5.71.E-02 |
| Slc<br>transporter        | Slc2a1 (Glut1)         | 105 $\pm$ 5                               | 194 $\pm$ 9       | 1.84                 | 3.63.E-04 |
|                           | Slc16a1 (Mct1)         | 10.3 $\pm$ 0.7                            | 18.2 $\pm$ 1.5    | 1.77                 | 1.42.E-04 |
|                           | Slc22a8 (Oat3)         | 1.92 $\pm$ 0.18                           | 2.33 $\pm$ 0.57   | 1.21                 | 2.77.E-01 |
| Receptor                  | Insr                   | 0.952 $\pm$ 0.039                         | 1.38 $\pm$ 0.14   | 1.45                 | 7.19.E-03 |
|                           | Lrp1                   | 0.993 $\pm$ 0.082                         | 1.03 $\pm$ 0.17   | 1.04                 | 7.11.E-01 |
|                           | Tfr1                   | 2.76 $\pm$ 0.36                           | 5.49 $\pm$ 0.49   | 1.99                 | 2.29.E-04 |
| Tight junction<br>protein | Claudin-5              | 6.65 $\pm$ 0.71                           | 13.6 $\pm$ 1.1    | 2.04                 | 9.91.E-05 |

The data represents the mean  $\pm$  SD (n=4). D; Developed, S; Standard

Table S4. Numbers of identified and significantly changed proteins in isolated brain capillary fractions.

| A                             |            |                                |                             |                             |
|-------------------------------|------------|--------------------------------|-----------------------------|-----------------------------|
|                               | Identified | Significant<br>(p or FDR<0.05) | Significant and<br>fold>2.0 | Significant and<br>fold<0.5 |
| Student t-test                |            | 1065                           | 100                         | 258                         |
| Benjamini–<br>Hochberg method | 1352       | 1051                           | 99                          | 258                         |

  

| B                             |            |                                |                              |                             |
|-------------------------------|------------|--------------------------------|------------------------------|-----------------------------|
|                               | Identified | Significant<br>(p or FDR<0.05) | Significant and<br>fold>1.25 | Significant and<br>fold<0.8 |
| Student t-test                |            | 79                             | 28                           | 1                           |
| Benjamini–<br>Hochberg method | 1100       | 0                              | 0                            | 0                           |

(A) Number of identified and significantly changed proteins in isolated brain capillary fractions of standard method and the developed method. The volcano plot and original data were shown in Figure 3A and Table S7, respectively. (B) Number of identified and significantly changed proteins in isolated brain capillary fractions of Wt and Glut1<sup>+/-</sup> mice. The volcano plot and original data were shown in Figure 5A and Table S8, respectively. The p-value was evaluated using Student's t-test, and FDR (q-value) was evaluated using Benjamini–Hochberg method.

Table S5. Significantly different proteins in brain capillary fraction isolated from Wt and Glut1<sup>+/-</sup> mouse using proteomic analysis.

| Uniprot ID | Protein name                                               | Fold change<br>(Glut1 <sup>+/-</sup> /Wt) | P-value   |     |
|------------|------------------------------------------------------------|-------------------------------------------|-----------|-----|
| E9QA15     | Caldesmon 1                                                | 1.85                                      | 8.86.E-03 | (2) |
| Q9QWI6     | SRC kinase signaling inhibitor 1                           | 1.61                                      | 2.79.E-04 |     |
| Q7TPR4     | Alpha-actinin-1                                            | 1.46                                      | 1.48.E-02 | (2) |
| Q62261     | Spectrin beta chain, non-erythrocytic 1                    | 1.46                                      | 1.69.E-02 |     |
| E9Q0S6     | Tensin 1                                                   | 1.44                                      | 1.79.E-02 | (2) |
| Q9D2N4     | Dystrobrevin alpha                                         | 1.44                                      | 9.02.E-03 |     |
| P16546     | Spectrin alpha chain, non-erythrocytic 1                   | 1.43                                      | 9.70.E-03 |     |
| P97823     | Acyl-protein thioesterase 1                                | 1.43                                      | 9.56.E-03 | (2) |
| P26041     | Moesin                                                     | 1.41                                      | 6.41.E-03 | (2) |
| Q9WV02     | RNA-binding motif protein, X chromosome                    | 1.40                                      | 1.03.E-02 |     |
| Q61234     | Alpha-1-syntrophin                                         | 1.38                                      | 2.44.E-02 |     |
| Q9Z204     | Heterogeneous nuclear ribonucleoproteins C1/C2             | 1.37                                      | 1.79.E-02 | (2) |
| P26039     | Talin-1                                                    | 1.37                                      | 1.63.E-02 |     |
| P06837     | Neuromodulin                                               | 1.36                                      | 1.17.E-02 |     |
| Q9CY58     | Plasminogen activator inhibitor 1 RNA-binding protein      | 1.36                                      | 2.65.E-03 | (2) |
| P11531     | Dystrophin                                                 | 1.36                                      | 8.90.E-03 |     |
| Q9QXS1     | Plectin                                                    | 1.32                                      | 8.43.E-04 |     |
| P55284     | Cadherin-5                                                 | 1.32                                      | 4.41.E-04 | (1) |
| Q61033     | Lamina-associated polypeptide 2, isoforms alpha/zeta       | 1.32                                      | 1.27.E-02 |     |
| Q8BTM8     | Filamin-A                                                  | 1.31                                      | 1.26.E-02 | (2) |
| P57780     | Alpha-actinin-4                                            | 1.31                                      | 1.08.E-02 | (2) |
| P26040     | Ezrin                                                      | 1.30                                      | 2.80.E-02 |     |
| Q62417     | Sorbin and SH3 domain-containing protein 1                 | 1.29                                      | 1.72.E-02 |     |
| Q8VHM5     | Heterogeneous nuclear ribonucleoprotein R                  | 1.28                                      | 4.36.E-02 |     |
| Q07417     | Short-chain specific acyl-CoA dehydrogenase, mitochondrial | 1.27                                      | 5.57.E-03 |     |

|        |                                            |       |           |     |
|--------|--------------------------------------------|-------|-----------|-----|
| P46638 | Ras-related protein Rab-11B                | 1.26  | 1.76.E-02 |     |
| P53994 | Ras-related protein Rab-2A                 | 1.26  | 1.69.E-02 |     |
| O54724 | Polymerase I and transcript release factor | 1.25  | 8.44.E-03 | (1) |
| P04370 | Myelin basic protein                       | 0.738 | 3.54.E-02 |     |

---

The data was extracted from the proteomic analysis results. Proteins were extracted by using the following criteria:  $p < 0.05$  and  $>1.25$ -fold. (1) and (2) in the right-most column indicate the brain capillary endothelial cell (BCEC) specific and selective protein [(expression levels at most highly expressed cell types/expression levels at secondary highly expressed cell types) extracted from the mouse brain RNA-sequencing database is over 10 and 1.0-fold].

Table S6. Expression levels of brain cells marker protein of both isolated brain capillary fraction and whole brain fraction using proteomic analysis.

| Cell types                          | Protein name | Fold change<br>(Brain capillary/Whole brain) | P-value   |
|-------------------------------------|--------------|----------------------------------------------|-----------|
| Brain capillary<br>endothelial cell | Mdr1a        | 46.6                                         | 3.53.E-05 |
| Astrocyte                           | Gfap         | 4.10                                         | 7.32.E-04 |
| Pericyte                            | Mcam         | 4.78                                         | 4.09.E-04 |
| Neuron                              | Syp          | 0.183                                        | 3.00.E-08 |
| Oligodendrocyte                     | Mog          | 0.0818                                       | 1.04.E-07 |
| Microglia                           | Coro1a       | 0.364                                        | 1.82.E-04 |

Table S7. Identified proteins in the brain capillary fraction of mice isolated by the standard method and the developed method using proteomic analysis.

Table S8. Identified proteins in brain capillary fraction isolated from Wt and Glut1<sup>+/-</sup> mice using proteomic analysis.

Table S9. Identified proteins in isolated brain capillary fraction and whole brain fraction using proteomic analysis.



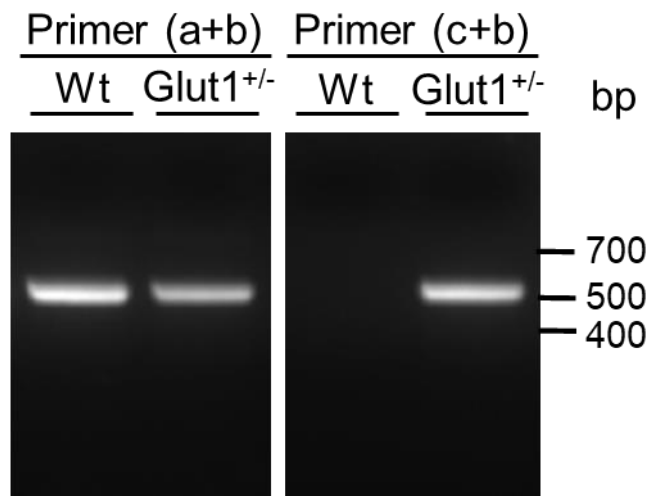

Figure S1. Genotyping of Glut1 by genomic PCR analysis. The genotyping of all offsprings was analyzed using PCR of genomic DNA from the tail, as previously reported<sup>19</sup>. Primer (a+b) detected the wild type allele, and primer (c+b) detected the mutated allele.

Potter homogenizer

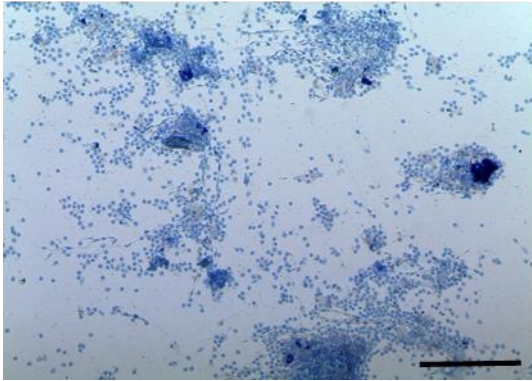

Bead homogenizer

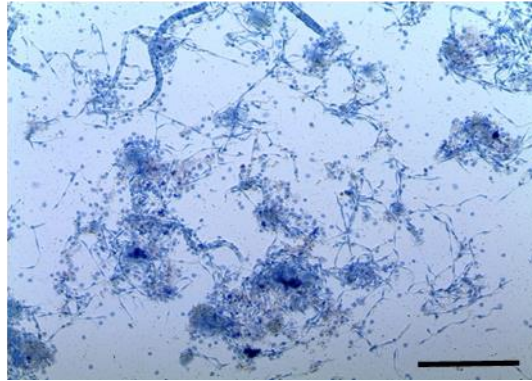

Figure S2. Images of suspended sample of the pellet which is concentrated after dextran centrifuge of brain homogenized by Potter homogenizer (left) and bead homogenizer (right). Each sample was stained by trypan blue. Scale bar = 250  $\mu\text{m}$ .

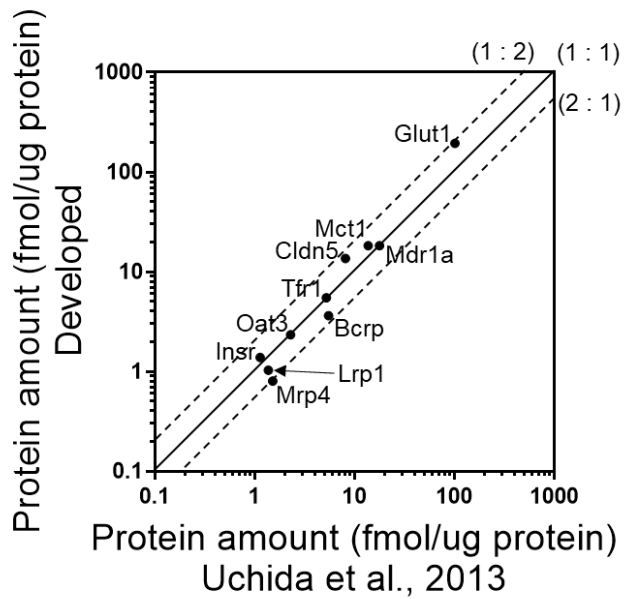

Figure S3. Absolute protein expression levels of transporters, receptors, and tight junction protein between brain capillary fraction isolated by the developed method and previous report<sup>9</sup>. The solid line passing through the origin represents the line of identity, and the broken lines represent 2-fold differences.

Figure S4. Full unedited blot for Figure 2D.

Figure S5. Full unedited blot for Figure 4C.

Figure S6. Full unedited blot for Figure 6A.
