# Supplementary material
Source: PubMed Central journal article supplement (PMC8054721)
Supplement: sj-pdf-2-jcb-10.1177_0271678X20941449.pdf [file sj-pdf-2-jcb-10.1177_0271678X20941449.pdf]

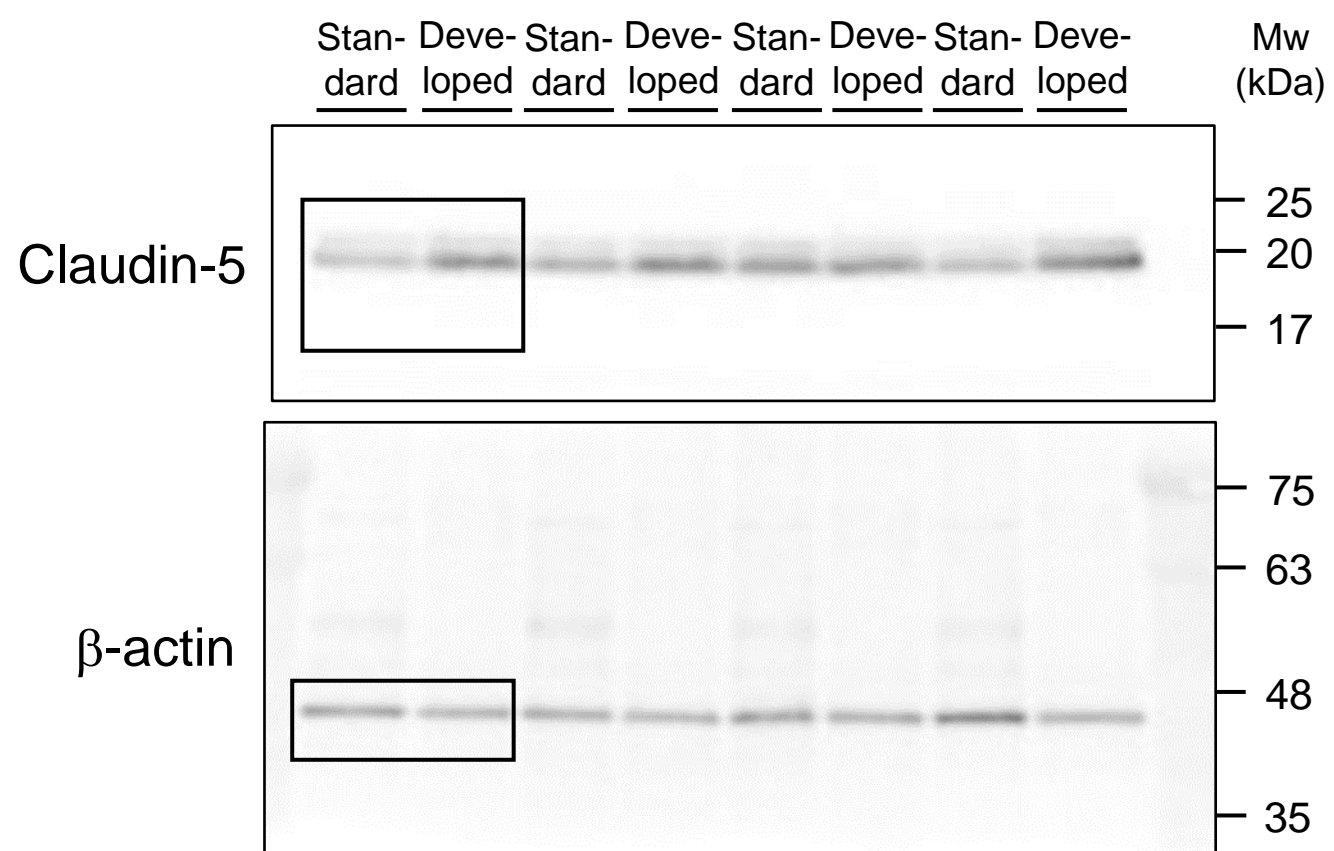

Figure S4. Full unedited blot for Figure 2D

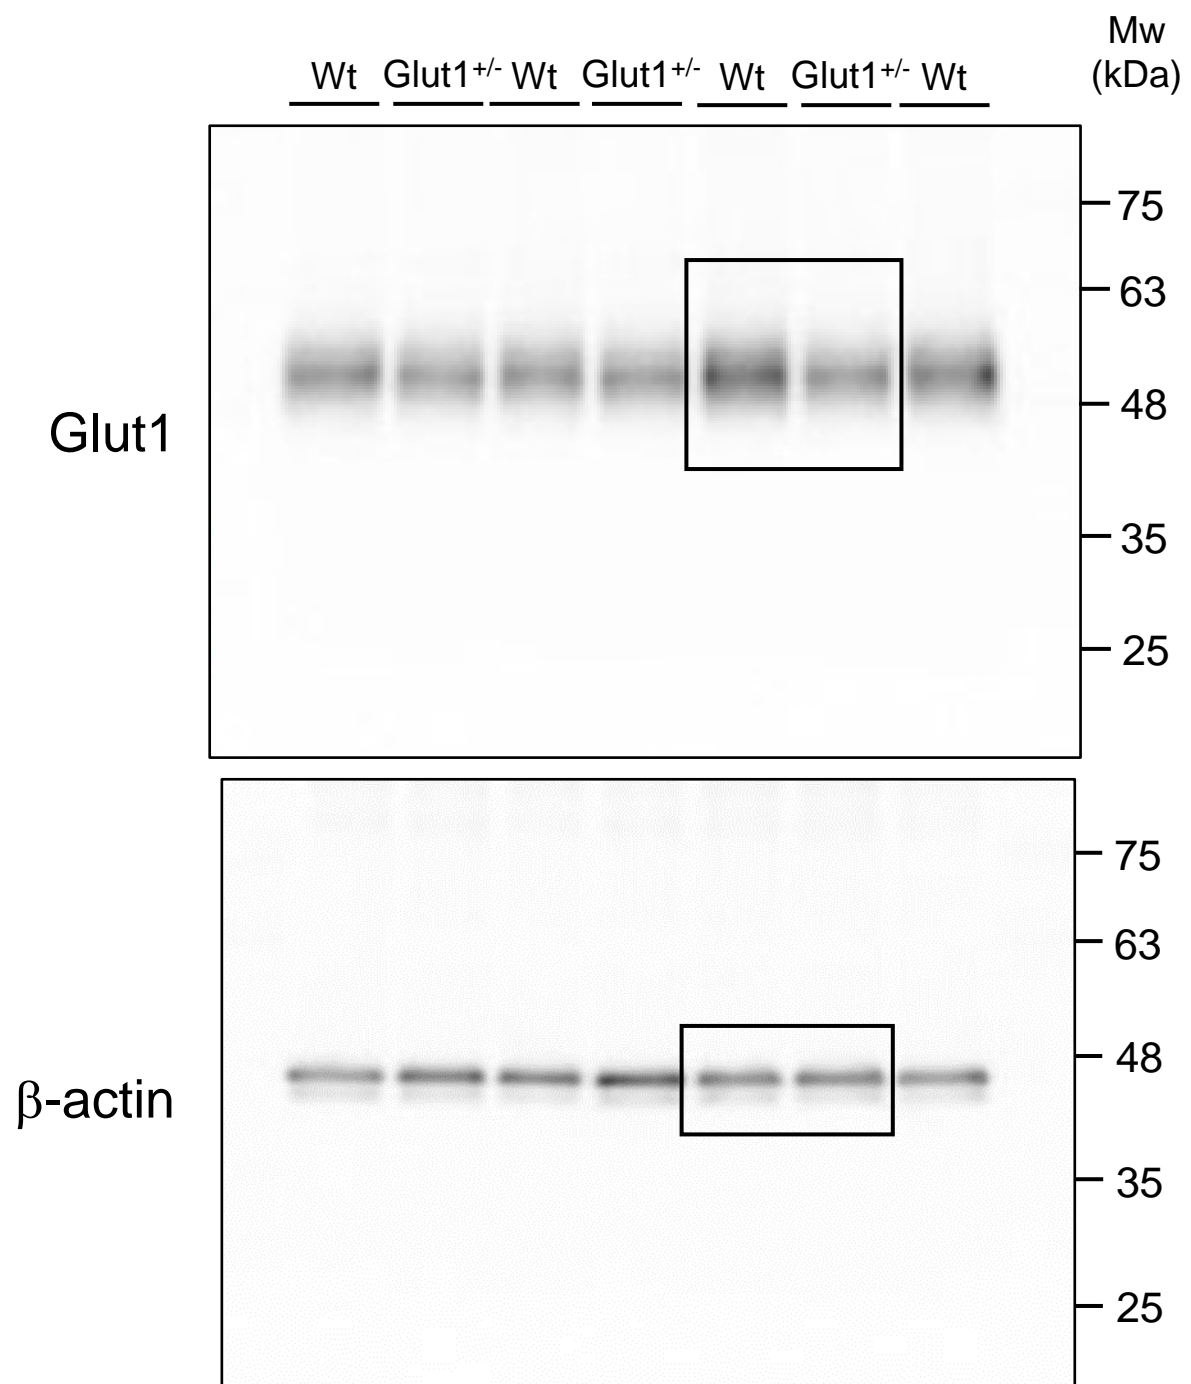

Figure S5. Full unedited blot for Figure 4C

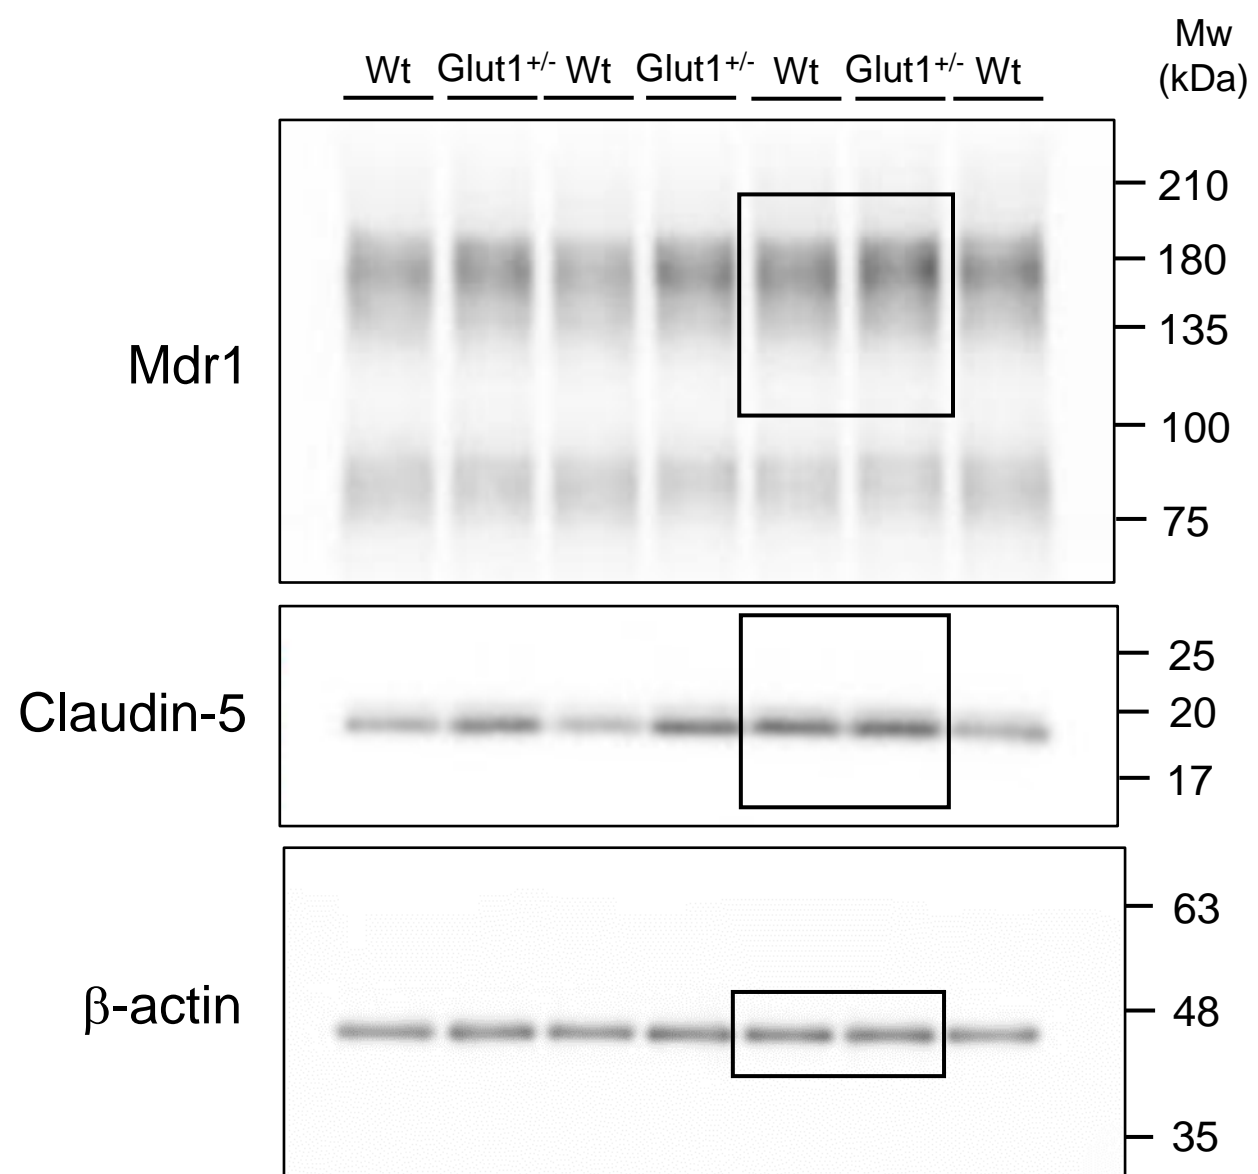

Figure S6. Full unedited blot for Figure 6A
